# Supplementary material for: Improving Statistical Projections of Ocean Dynamic Sea-level Change Using Pattern Recognition Techniques
Source: Copernicus journal article supplement (doi:10.5194/egusphere-2022-1293), 2022-12-02
Supplement: Supplementary file 1 [file egusphere-2022-1293-supplement.pdf]

# Supplementary Material: ‘Improving Statistical Projections of Ocean Dynamic Sea-level Change Using Pattern Recognition Techniques.’

Víctor Malagón-Santos<sup>1</sup>, Aimée B.A. Slangen<sup>1</sup>, Tim H.J. Hermans<sup>1,2</sup>, Sönke Dangendorf<sup>3</sup>, Marta Marcos<sup>4</sup>, Nicola Maher<sup>5,6,7</sup>.

<sup>1</sup>NIOZ Royal Netherlands Institute for Sea Research, Department of Estuarine & Delta Systems, P.O. Box 140, 4400 AC Yerseke, the Netherlands.

<sup>2</sup>University of Utrecht, Institute for Marine and Atmospheric research Utrecht (IMAU), Utrecht, The Netherlands

<sup>3</sup>Department of River-Coastal Science and Engineering, Tulane University, New Orleans, USA.

<sup>4</sup>Mediterranean Institute for Advanced Studies (IMEDEA), Spanish National Research Council-University of Balearic Islands (CSIC-UIB), Esporles, Spain.

<sup>5</sup>Cooperative Institute for Research in Environmental Science, University of Colorado, Boulder, CO, USA.

<sup>6</sup>Department of Atmospheric and Oceanic Sciences, University of Colorado, Boulder, CO, USA.

<sup>7</sup>Max Planck Institute for Meteorology, Hamburg, Germany.

*Correspondence to:* Víctor Malagón-Santos (victor.malagon.santos@nioz.nl)

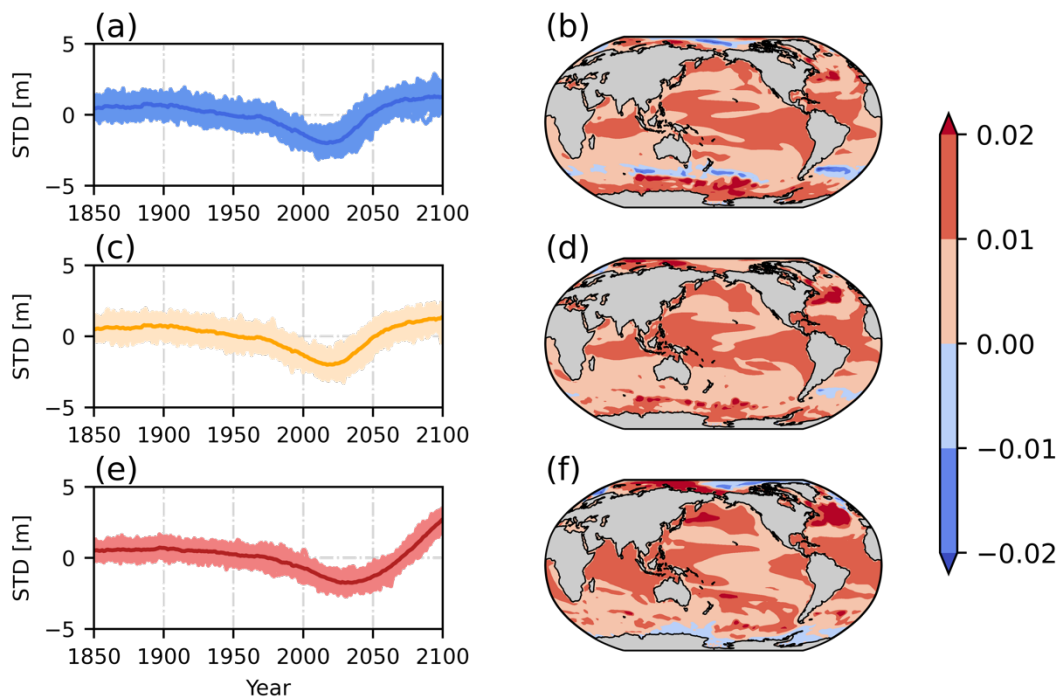

**Figure S1:** Time evolution in terms of standard deviations (a, c, and e, respectively) and associated S/N M EOF pattern number 2 for RCP 2.6, 4.5, and 8.5 (b, d, and f respectively). Light coloured lines in a, c, and d represent standard deviation anomalies from ensemble members, whereas dark coloured lines depict ensemble mean evolution of the pattern.

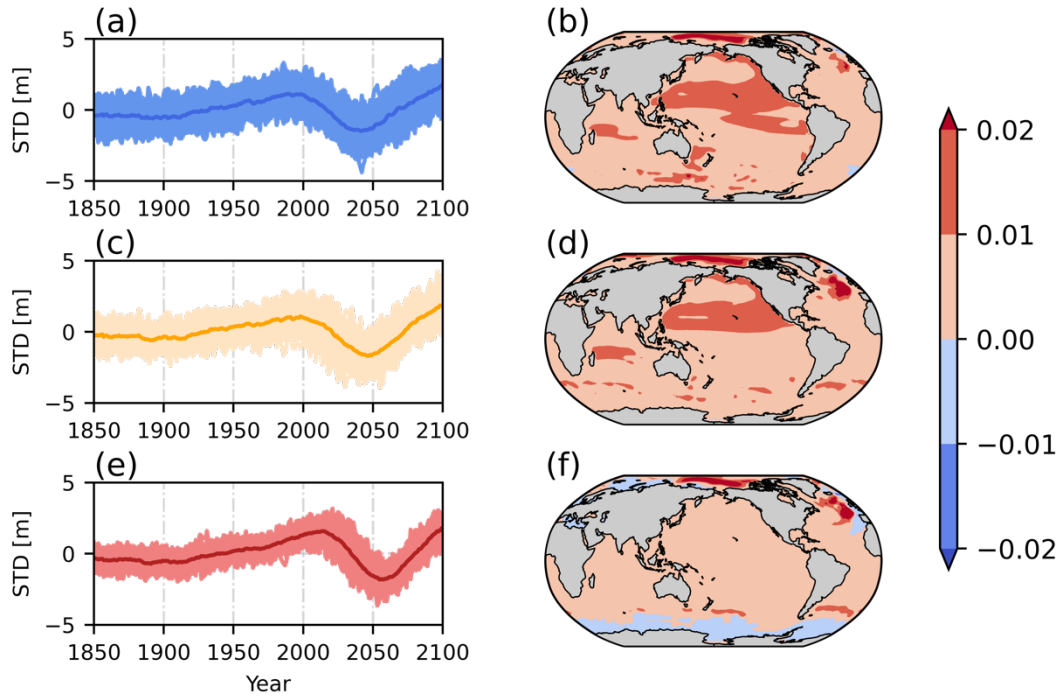

**Figure S2:** Time evolution in terms of standard deviations (a, c, and e, respectively) and associated S/N M EOF pattern number 3 for RCP 2.6, 4.5, and 8.5 (b, d, and f respectively). Light coloured lines in a, c, and d represent standard deviation anomalies from ensemble members, whereas dark coloured lines depict ensemble mean evolution of the pattern.

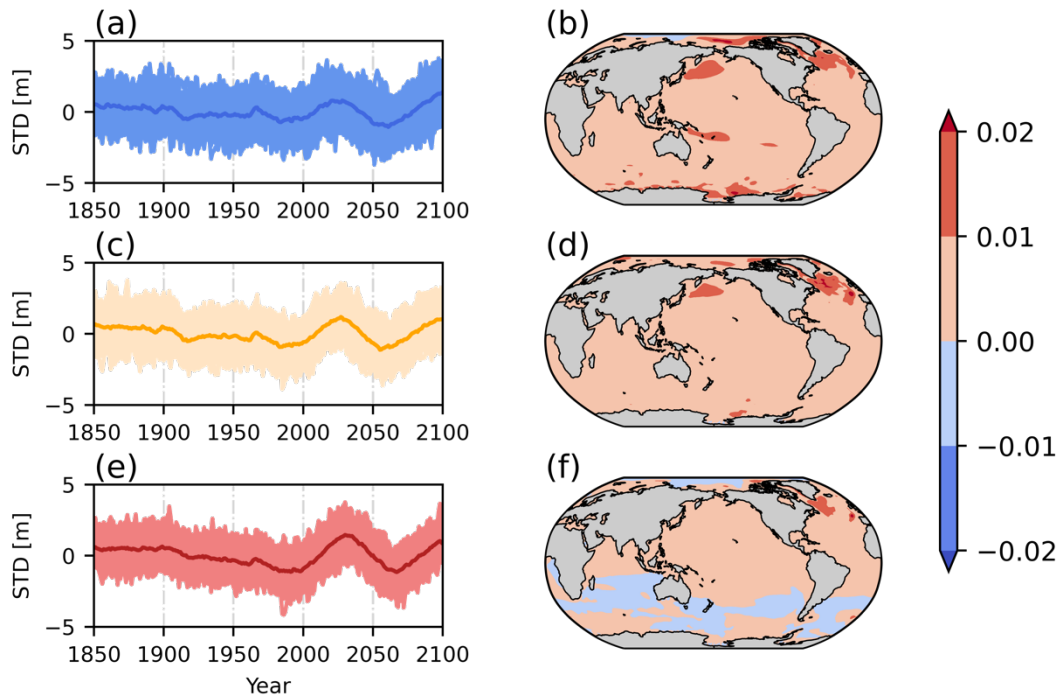

**Figure S3:** Time evolution in terms of standard deviations (a, c, and e, respectively) and associated S/N M EOF pattern number 4 for RCP 2.6, 4.5, and 8.5 (b, d, and f respectively). Light coloured lines in a, c, and d represent standard deviation anomalies from ensemble members, whereas dark coloured lines depict ensemble mean evolution of the pattern.

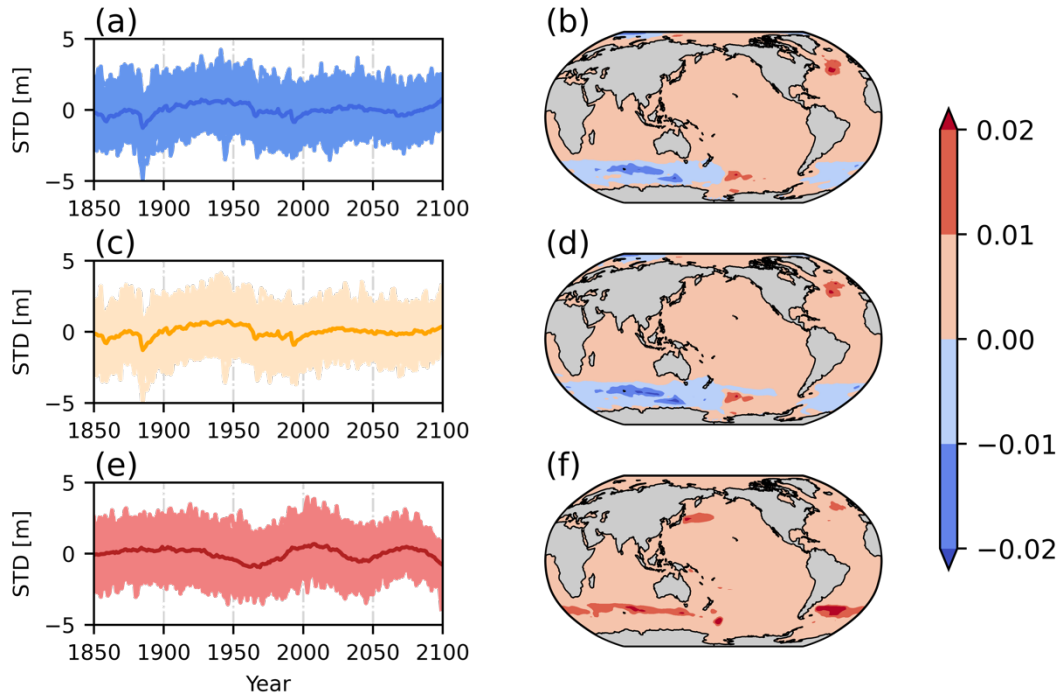

**Figure S4:** Time evolution in terms of standard deviations (a, c, and e, respectively) and associated S/N M EOF pattern number 5 for RCP 2.6, 4.5, and 8.5 (b, d, and f respectively). Light coloured lines in a, c, and d represent standard deviation anomalies from ensemble members, whereas dark coloured lines depict ensemble mean evolution of the pattern.

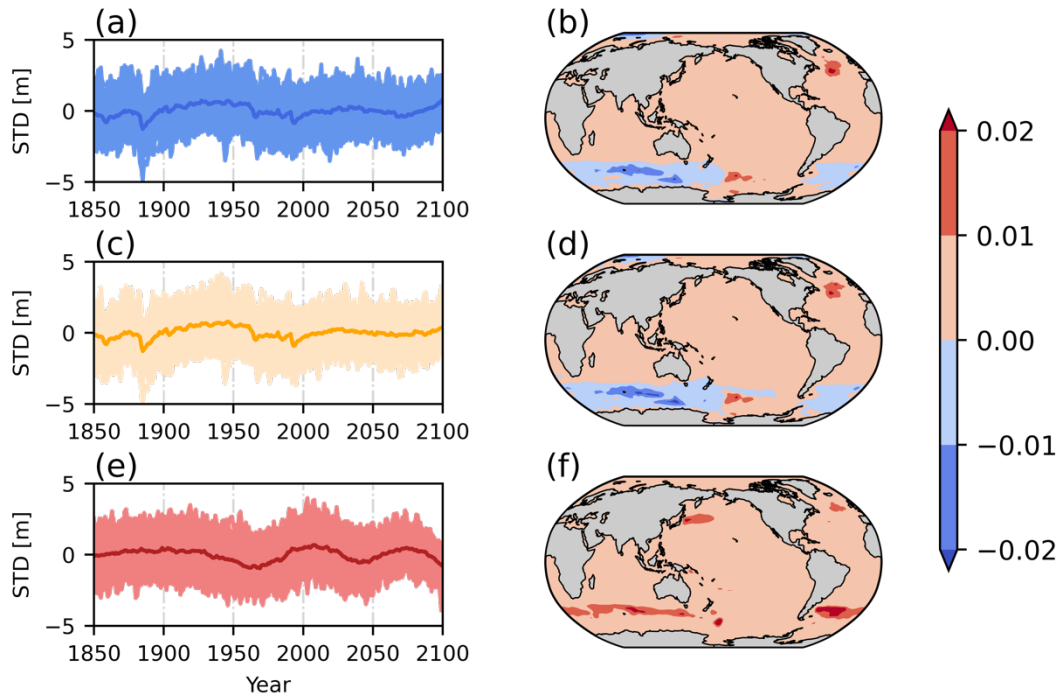

**Figure S5:** Time evolution in terms of standard deviations (a, c, and e, respectively) and associated S/N M EOF pattern number 6 for RCP 2.6, 4.5, and 8.5 (b, d, and f respectively). Light coloured lines in a, c, and d represent standard deviation anomalies from ensemble members, whereas dark coloured lines depict ensemble mean evolution of the pattern.

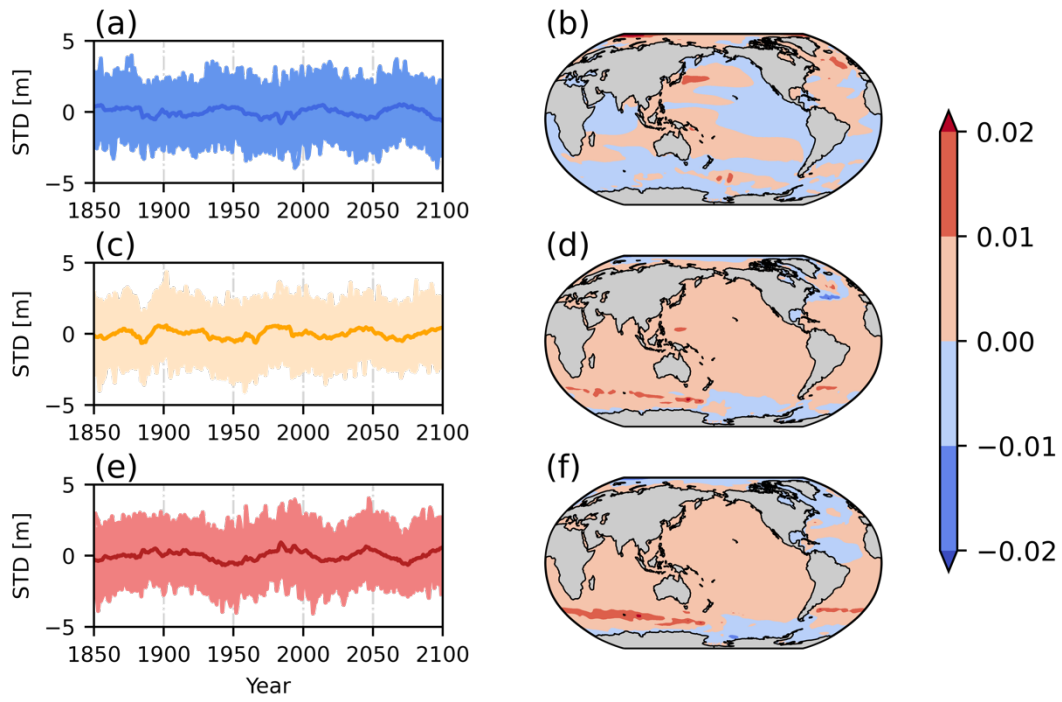

**Figure S6:** Time evolution in terms of standard deviations (a, c, and e, respectively) and associated S/N M EOF pattern number 7 for RCP 2.6, 4.5, and 8.5 (b, d, and f respectively). Light coloured lines in a, c, and d represent standard deviation anomalies from ensemble members, whereas dark coloured lines depict ensemble mean evolution of the pattern.

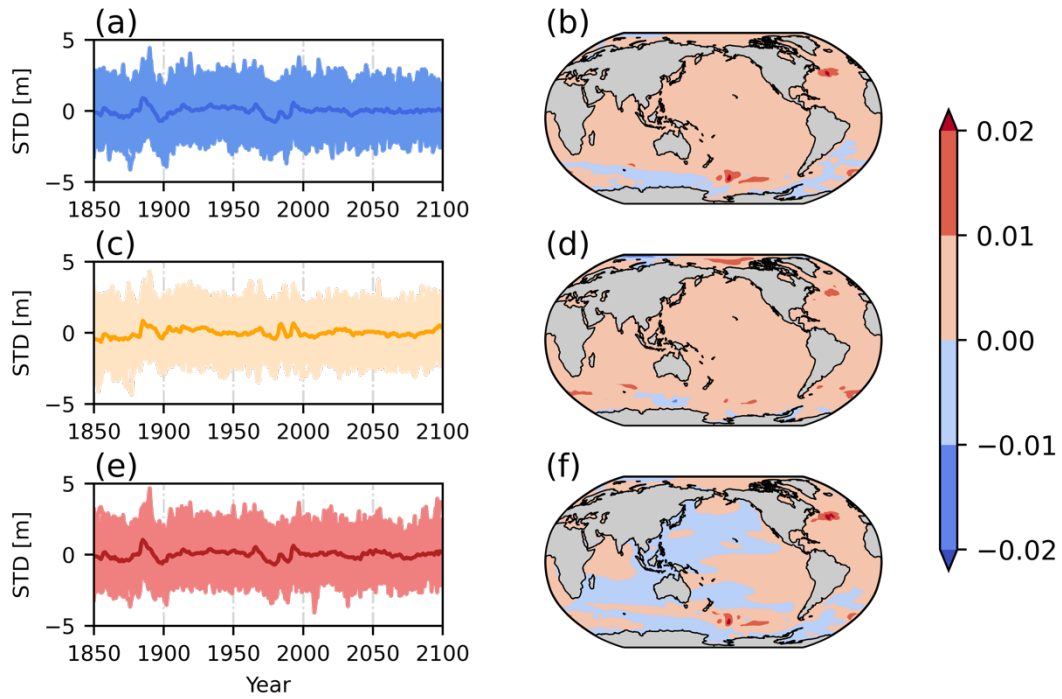

**Figure S7:** Time evolution in terms of standard deviations (a, c, and e, respectively) and associated S/N M EOF pattern number 8 for RCP 2.6, 4.5, and 8.5 (b, d, and f respectively). Light coloured lines in a, c, and d represent standard deviation anomalies from ensemble members, whereas dark coloured lines depict ensemble mean evolution of the pattern.
